# Supplementary material for: Magnetic separation-assisted cluster-amplified versatile fluorescent aptasensors for the sensitive detection of target biomolecules
Source: Royal Society of Chemistry journal article supplement (doi:10.1039/d3an01535a), 2023-01-01
Supplement: d3an01535a1.pdf [file d3an01535a1.pdf]

Electronic Supplementary Information

**Magnetic separation-assisted cluster-amplified versatile fluorescent aptasensors for sensitive detection of target biomolecules**

Ailing Kan <sup>‡a,b</sup>, Shengyong Ding <sup>‡a</sup>, Aimei Ouyang <sup>c</sup>, Nan Zhang <sup>\*b</sup>, Wei Jiang <sup>\*a</sup>

<sup>a</sup> *School of Chemistry and Chemical Engineering, Shandong University, 250100 Jinan, P. R. China.*

<sup>b</sup> *Research Center of Basic Medicine, Breast Center, Central Hospital Affiliated to Shandong First Medical University, Jinan, 250013, P. R. China.*

<sup>c</sup> *Department of Radiology, Central Hospital Affiliated to Shandong First Medical University, 250013 Jinan, P. R. China.*

<sup>‡</sup> *These authors contributed equally.*

*Corresponding Authors:*

*(Wei Jiang) wjiang@sdu.edu.cn; (Nan Zhang) zlkzn2016@126.com*

## **TABLE OF CONTENTS**

1. Procedure for the synthesis of aminated MSNs.
2. Fig. S1. Schematic illustration of the modular aptasensor for PDGF-BB detection.
3. Fig. S2. Optimization of the experimental conditions.
4. Fig. S3. The fluorescence intensities for different concentrations of ATP in reaction buffer and human serum.
5. Table S1 Sequences of oligonucleotides used for ATP detection.
6. Table S2 Intra-day and Inter-day detection for ATP of different concentrations.
7. Table S3 Recoveries of ATP in 10 % human serum.
8. Table S4 Sequences of oligonucleotides used for thrombin detection.
9. Table S5 Detection of thrombin of different concentrations in 10 % human serum.
10. Table S6 Sequences of oligonucleotides used for PDGF-BB detection.
11. Table S7 Detection of PDGF-BB of different concentrations in 10 % human serum.

**Synthesis of aminated MSNs.** Co-condensation method was adopted to synthesize the aminated MSNs (MSN-NH<sub>2</sub>). Aqueous sodium hydroxide (1.5 M, 2.4 mL) was added to 240 mL of Cetyltrimethylammonium bromide (CTAB) solution (5.7 mM) and stirred for 5 min. Then heated the mixture to 80 °C and maintained for 30 min. Subsequently, 2.4 mL of Tetraethoxysilane (TEOS) and 0.5 mL of (3-Aminopropyl)-triethoxysilane (APTES) were dropwise added sequentially. Then stabilized the mixture at 80 °C for 2 h and cooled it to room temperature. Separated the resultant precipitate from the mixture by centrifugation, and washed it using ethanol and water. The internal CTAB was removed by refluxing it in a mixed liquor of methanol (80 mL) and hydrochloric acid solution (37.4 %, 1.0 mL) for 15 h. Finally, rinsed the MSN-NH<sub>2</sub> by ethanol and dried it for storage.

## Supplementary figures

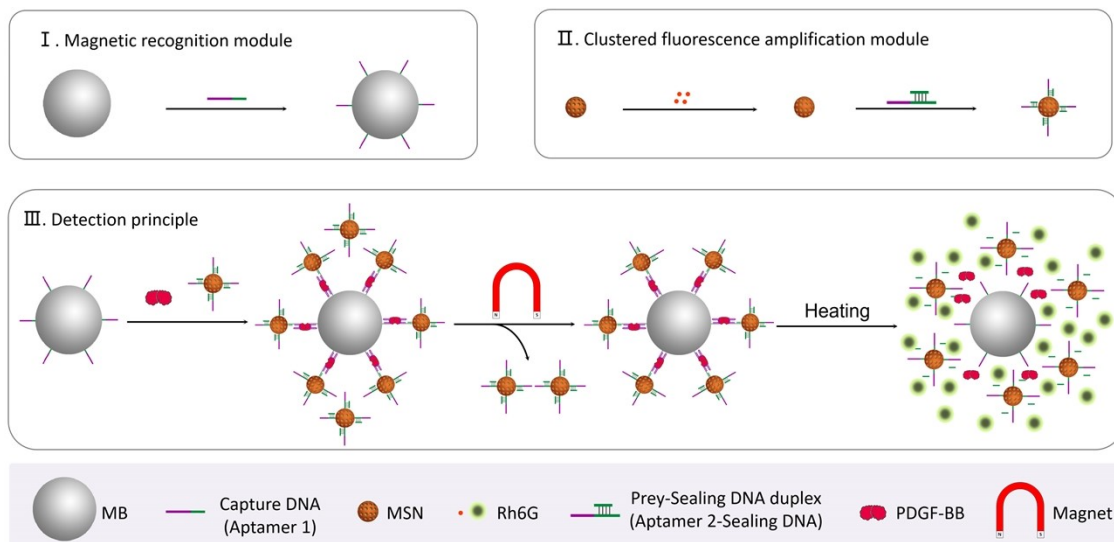

**Fig. S1.** Schematic illustration of the modular aptasensor for PDGF-BB detection.

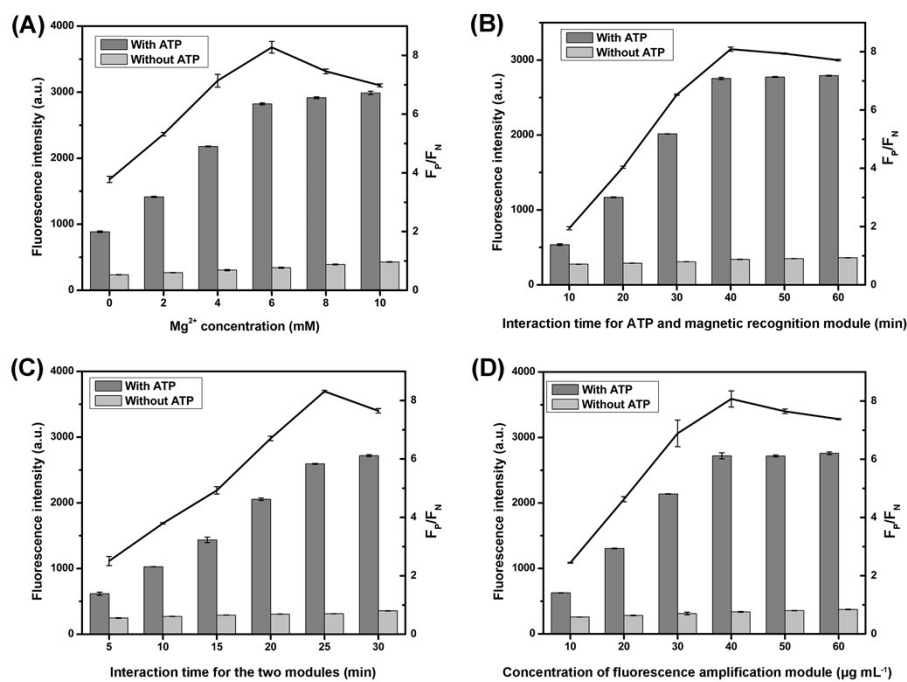

**Fig. S2.** Effect of (A)  $Mg^{2+}$  concentration, (B) interaction time for ATP and magnetic recognition module, (C) interaction time for fluorescence amplification module and magnetic recognition module, (D) concentration of fluorescence amplification module on the fluorescence intensity and  $F/F_0$ . Error bars showed the standard deviation of three parallel experiments.

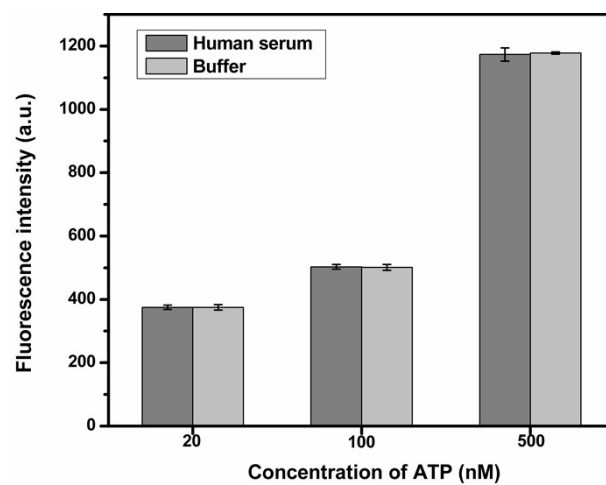

**Fig. S3.** The fluorescence intensities for different concentrations of ATP in reaction buffer and human serum. (Error bars showed the standard deviations of three independent experiments.)

## Supplementary tables

| Name        | Sequence (5'→3')                               |
|-------------|------------------------------------------------|
| Aptamer     | GAGAGAACCTGGGGGAGTATTGCGGAGGAAGGT              |
| Capture DNA | CCCAGGTTCTCTCTCACACATCTGT-biotin               |
| Prey DNA    | GAGAGAACCTGGGGATATGCTAGACTATCG-NH <sub>2</sub> |
| Sealing DNA | CGATAGTCTAGCATA                                |

**Table S1** Sequences of oligonucleotides used for ATP detection.

| True concentration<br>(nM) | Intra-day<br>measurement (nM) | RSD<br>(n = 3) | Inter-day<br>measurement (nM) | RSD<br>(n = 3) |
|----------------------------|-------------------------------|----------------|-------------------------------|----------------|
| 20                         | 20.3                          | 3.1 %          | 19.2                          | 5.5 %          |
|                            | 21.5                          |                | 21.2                          |                |
|                            | 20.5                          |                | 19.4                          |                |
| 100                        | 104                           | 3.1 %          | 103                           | 4.6 %          |
|                            | 105                           |                | 103                           |                |
|                            | 99                            |                | 95                            |                |
| 500                        | 508                           | 1.0 %          | 488                           | 2.9 %          |
|                            | 498                           |                | 516                           |                |
|                            | 506                           |                | 508                           |                |

**Table S2** Intra-day and Inter-day detection for ATP of different concentrations.

| True<br>concentration<br>(nM) | F - F <sub>0</sub> (a.u.) | Calculated<br>concentration (nM) | Average<br>recovery | RSD<br>(n = 3) |
|-------------------------------|---------------------------|----------------------------------|---------------------|----------------|
| 20                            | 37.87                     | 19.0                             | 98 %                | 4.0 %          |
|                               | 40.27                     | 20.5                             |                     |                |
|                               | 38.51                     | 19.4                             |                     |                |
| 100                           | 174.1                     | 104                              | 102 %               | 3.2 %          |
|                               | 172.5                     | 103                              |                     |                |
|                               | 164.5                     | 98                               |                     |                |
| 500                           | 821.7                     | 508                              | 101 %               | 2.1 %          |
|                               | 826.5                     | 511                              |                     |                |
|                               | 794.5                     | 491                              |                     |                |

**Table S3** Recoveries of ATP in 10 % human serum.

| Name        | Sequence (5'→3')                               |
|-------------|------------------------------------------------|
| Aptamer     | GCTCGGAGTCCGTGGTAGGGCAGGTTGGGGTGACT            |
| Capture DNA | ACGGACTCCGAGCTCACACATCTGT-biotin               |
| Prey DNA    | GCTCGGAGTCCGTGATATGCTAGACTATCG-NH <sub>2</sub> |
| Sealing DNA | CGATAGTCTAGCATA                                |

**Table S4** Sequences of oligonucleotides used for thrombin detection.

| True concentration<br>(nM) | F - F <sub>0</sub> (a.u.) | Calculated<br>concentration (nM) | Average<br>recovery | RSD<br>(n = 3) |
|----------------------------|---------------------------|----------------------------------|---------------------|----------------|
| 0.04                       | 10.37                     | 0.036                            | 96 %                | 6.6 %          |
|                            | 11.39                     | 0.038                            |                     |                |
|                            | 12.92                     | 0.041                            |                     |                |
| 0.4                        | 195.7                     | 0.4                              | 95 %                | 4.6 %          |
|                            | 180.4                     | 0.37                             |                     |                |
|                            | 180.4                     | 0.37                             |                     |                |
| 4.0                        | 2079                      | 4.1                              | 98 %                | 3.9 %          |
|                            | 1927                      | 3.8                              |                     |                |
|                            | 1978                      | 3.9                              |                     |                |

**Table S5** Detection of thrombin of different concentrations in 10 % human serum.

| Name        | Sequence (5'→3')                                                     |
|-------------|----------------------------------------------------------------------|
| Aptamer 1   | CAGGCTACGGCACGTAGAGCATCACCATGATCCTGTCACACATCTGT-biotin               |
| Aptamer 2   | CAGGCTACGGCACGTAGAGCATCACCATGATCCTGGATCTACTAGACTATCG-NH <sub>2</sub> |
| Sealing DNA | CGATAGTCTAGCATA                                                      |

**Table S6** Sequences of oligonucleotides used for PDGF-BB detection.

| True concentration (nM) | F - F <sub>0</sub> (a.u.) | Calculated concentration (nM) | Average recovery | RSD (n = 3) |
|-------------------------|---------------------------|-------------------------------|------------------|-------------|
| 0.02                    | 10.89                     | 0.019                         | 95 %             | 5.2 %       |
|                         | 10.57                     | 0.018                         |                  |             |
|                         | 11.22                     | 0.020                         |                  |             |
| 0.2                     | 68.89                     | 0.20                          | 102 %            | 2.8 %       |
|                         | 68.89                     | 0.20                          |                  |             |
|                         | 72.09                     | 0.21                          |                  |             |
| 2.0                     | 677.6                     | 2.1                           | 98 %             | 5.8 %       |
|                         | 613.6                     | 1.9                           |                  |             |
|                         | 613.6                     | 1.9                           |                  |             |

**Table S7** Detection of PDGF-BB of different concentrations in 10 % human serum.
